# Supplementary material for: Atomistic insight into the electrode reaction mechanism of the cathode in molten carbonate fuel cells
Source: Royal Society of Chemistry journal article supplement (doi:10.1039/c7ta02011b), 2017-01-01
Supplement: c7ta02011b1.pdf [file c7ta02011b1.pdf]

## Electronic Supplementary Information

# Atomistic Insight into the Electrode Reaction Mechanism of Cathode in Molten Carbonate Fuel Cell

Kamil Czelej<sup>a</sup>, Karol Cwieka<sup>a\*</sup>, Juan C. Colmenares<sup>b</sup>, Krzysztof J. Kurzydłowski<sup>a</sup>

*<sup>a</sup>Faculty of Materials Science and Engineering, Warsaw University of Technology,  
141 Woloska Str., 02-507 Warsaw, Poland. \*E-mail: karol.cwieka@inmat.pw.edu.pl*

*<sup>b</sup>Institute of Physical Chemistry, Polish Academy of Sciences, 44/52 Kasprzaka Str.,  
01-224 Warsaw, Poland*

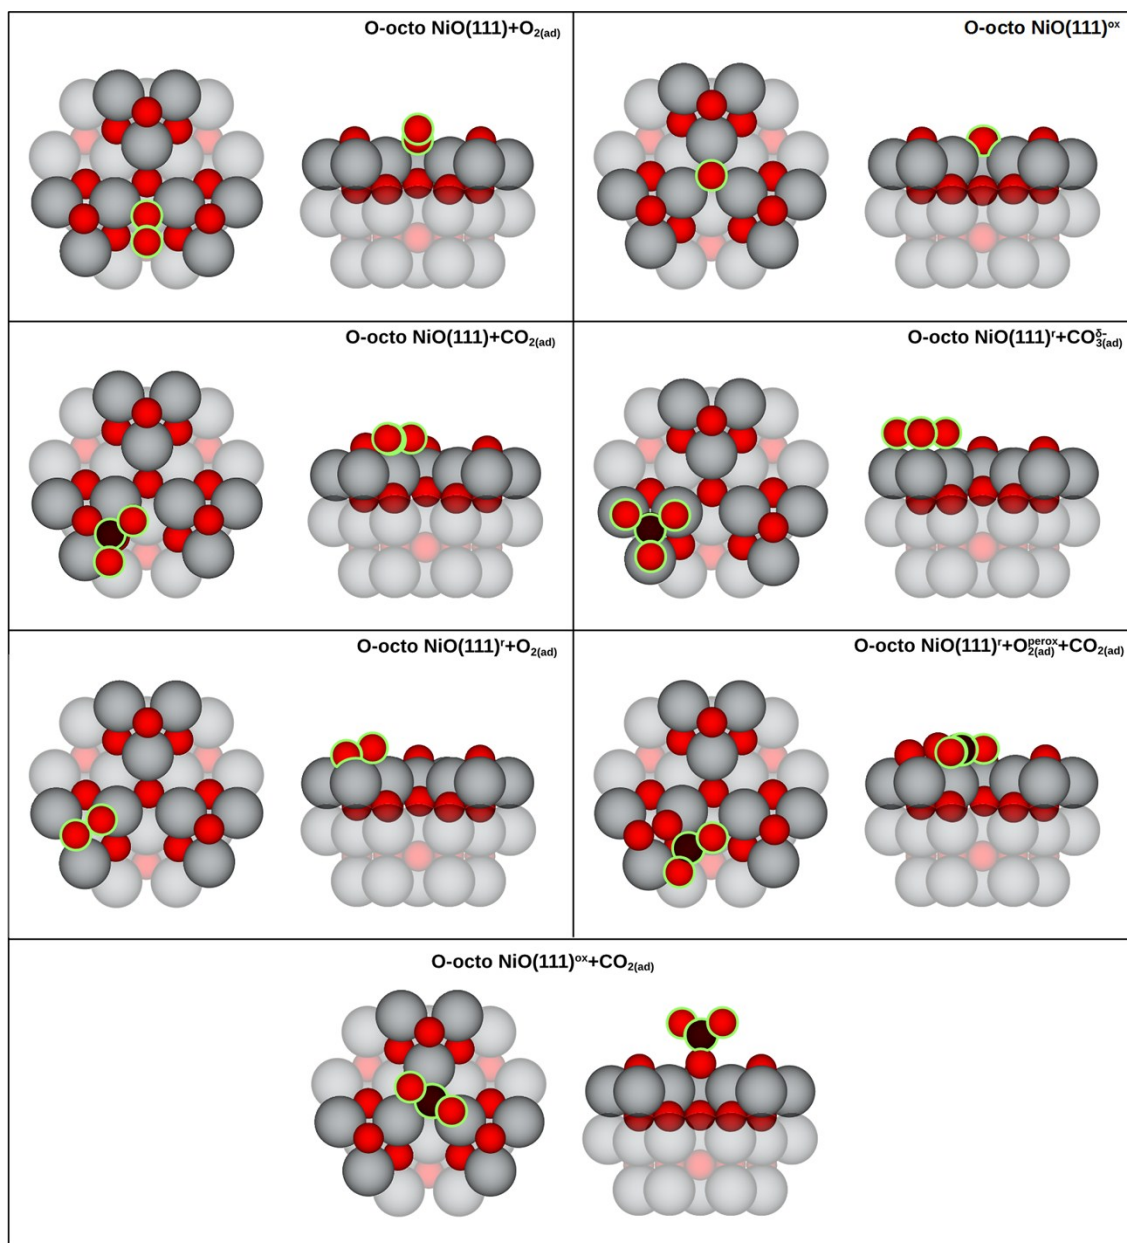

**Fig. S1** Detailed geometries (top and size views) of adsorbed species involved in the proposed mechanism of the electrode reaction mechanism of cathode in the molten carbonate fuel cell
